# Supplementary material for: Cost Analysis of a Novel Enzymatic Debriding Agent for Management of Burn Wounds
Source: Biomed Res Int. 2017 Feb 15;2017:9567498. doi: 10.1155/2017/9567498 (PMC5331316; doi:10.1155/2017/9567498)
Supplement: Supplementary file 1 — Raw data of the two studied groups of burn patients (treated with either Nexobrid or standard of care) used for direct cost assessment as well as for confidence interval analysis. [file 9567498.f1.xlsx]

## Sheet: Sheet3
SOC
	Patient	Gender	Age	%TBSA Burns	Escharectomy per surgery 1675€	Blood (RBC) per unit 208€	Autograft 12414€ per surgery	ICU stay (days) 1325€ \day	ICU stay cost	SICU stay (days) 475€ \day	SICU stay cost	total stay (ICU+SICU) in days	ICU+SICU stay total cost	total cost (stay+escar+autograft+blood)for patient
	1	M	42	21	1675	416	12414	12	15900	30	14250	42	30150	44655
	2	F	55	15	1675	416	12414	6	7950	30	14250	36	22200	36705
	3	M	64	18	3350	416	12414	8	10600	30	14250	38	24850	41030
	4	F	63	15	1675	208	12414	8	10600	26	12350	34	22950	37247
	5	M	19	17	1675	416	12414	9	11925	27	12825	36	24750	39255
	6	M	52	16	3350	416	12414	6	7950	34	16150	40	24100	40280
	7	M	41	15	1675	208	12414	6	7950	26	12350	32	20300	34597
	8	F	47	20	1675	208	12414	10	13250	31	14725	41	27975	42272
	9	M	39	18	3350	624	12414	7	9275	30	14250	37	23525	39913
	10	F	64	14	1675	416	12414	5	6625	24	11400	29	18025	32530
TOTAL	10			169	21775	3744	124140		102025		136800		238825	388484	€ Tot cost SOC patients group
NXB
5 gr NXB packages used per patient (5gr applied to 2,5% TBSA - cost per unit 839.27€)	Patient	Gender	Age	%TBSA Burns	Escharectomy per unit 1675€	Blood (RBC) per unit 208€	Autograft 12414€ per surgery	ICU stay (days) 1325€ \day	ICU stay cost	SICU stay (days) 475€ \day	SICU stay cost	total stay (ICU+SICU) in days	ICU+SICU stay total cost	total cost (stay+escar+autograft+blood)for patient
9	1	M	38	22	0	208	12414	9	11925	29	13775	38	25700	38322
6	2	F	60	15	0	208	12414	5	6625	25	11875	30	18500	31122
7	3	F	64	17	0	0	0	6	7950	27	12825	33	20775	20775
7	4	M	58	16	0	208	12414	7	9275	25	11875	32	21150	33772
6	5	M	44	15	0	208	12414	4	5300	22	10450	26	15750	28372
7	6	F	57	16	0	0	0	6	7950	23	10925	29	18875	18875
6	7	M	18	15	0	208	12414	4	5300	25	11875	29	17175	29797
8	8	M	45	19	0	0	12414	8	10600	26	12350	34	22950	35364
6	9	M	28	15	0	0	0	6	7950	21	9975	27	17925	17925
7	10	F	69	18	0	0	0	8	10600	26	12350	34	22950	22950
69	10			168	0	1040	74484		83475		118275		201750	277274
													+	57909.6	NXB cost
														335184	€ Tot cost NXB patients group
